# Supplementary material
Source: MDPI journal article supplement (https://www.mdpi.com/2073-4344/13/3/589)
Supplement: s1 [file s1]

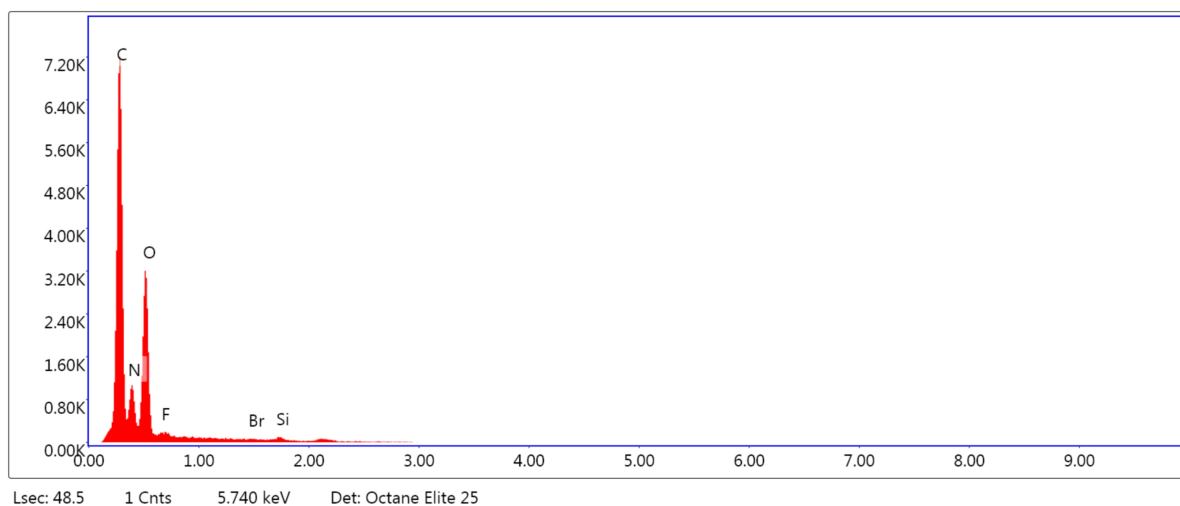

**Figure S1.** EDX spectrum of as-synthesized EY-APTES@PDA@PUF.

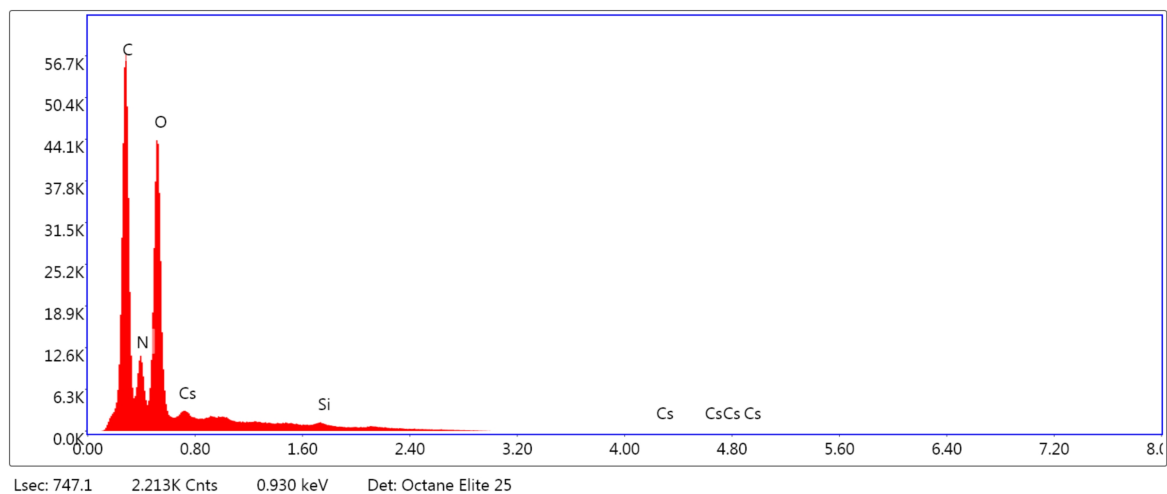

**Figure S2.** EDX spectrum of spent EY-APTES@PDA@PUF after 6 cycles of 2-methyl-5-nitro-isoquinolinium iodide oxidation.

H. Peng  
LIMA-COA  
LIMA  
25 rue Becquerel  
67000 Strasbourg

### RAPPORT D'ANALYSES

Référence : 2021-03-26-HP-Mousse en polyuréthane-1-2-V2

Nature de l'échantillon : **Mousse en polyuréthane**

Date de réception : 25/02/2021 et 26/03/2021

Conservation : ambiante

Date d'analyse : 31/03/2021

Techniques d'analyse :

Mise en solution par attaque acide, filtration d'un résidu solide, puis analyse par ICP-AES pour Si, analyse par ICP-MS pour Br.

| Réf. LIMA-COA | Réf. PAI       | Br        | Si        | unité |
|---------------|----------------|-----------|-----------|-------|
| PH-240        | 21-02-25-HP-02 | 1051 ± 29 | 2544 ± 77 | mg/kg |
| PH-270        | 21-03-26-HP-01 | 691 ± 19  | 859 ± 28  | mg/kg |

Signature :



Rédacteur : Anne Boos

Date : 07/04/2021

2021-03-26-HP-Mousse en polyuréthane-1-2-V2

Anne Boos  
Responsable de la plateforme

Page 1/1

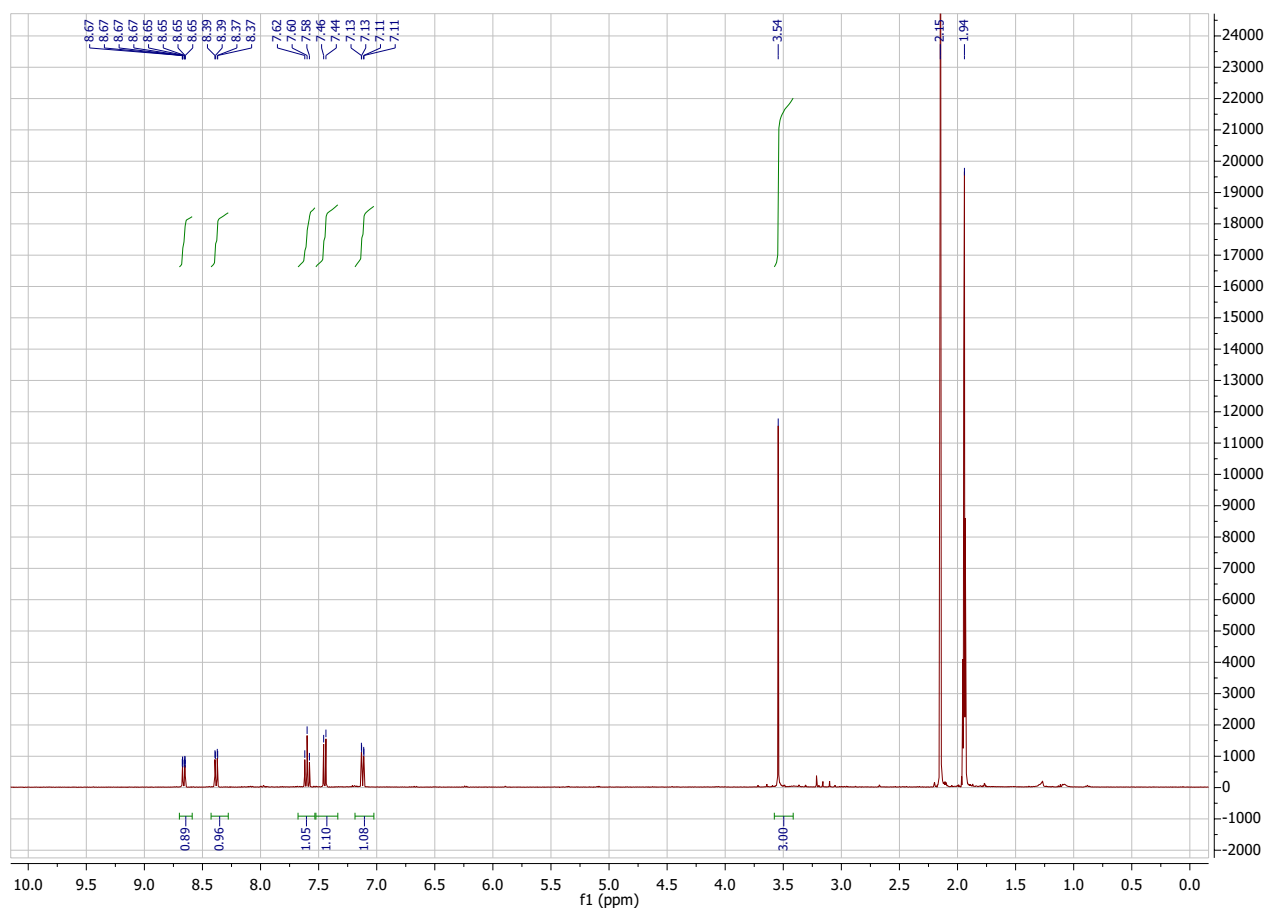

**Figure S3.**  $^1\text{H}$  NMR ( $\text{CD}_3\text{CN}$ ) spectrum of 2-methyl-5-nitro-isoquinolone.

$^1\text{H}$  NMR ( $\text{CD}_3\text{CN}$ , 400.13 MHz):  $\delta$  8.66 (dq, 1H), 8.38 (dd, 1H), 7.60 (t, 1H), 7.45 (d, 1H), 7.12 (dd, 1H), 3.54 (s, 3H, NMe).

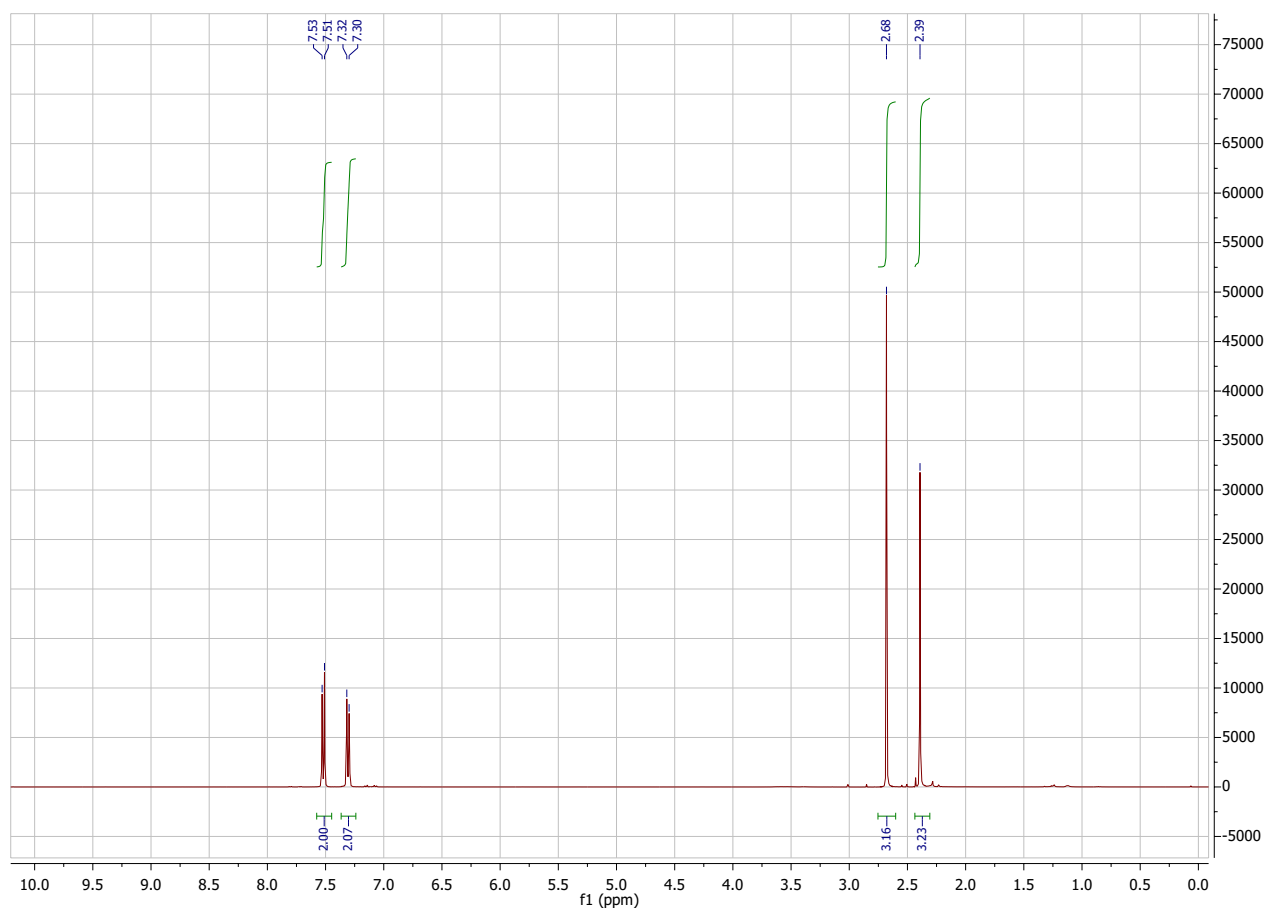

**Figure S4.** <sup>1</sup>H NMR (CDCl<sub>3</sub>) spectrum of *p*-tolyl methyl sulfoxide.

<sup>1</sup>H NMR (CDCl<sub>3</sub>, 400.13 MHz): δ 7.52 (d, 2H), 7.31 (d, 2H), 2.68 (s, 3H, CH<sub>3</sub>SO), 2.39 (s, 3H, *p*-Me).

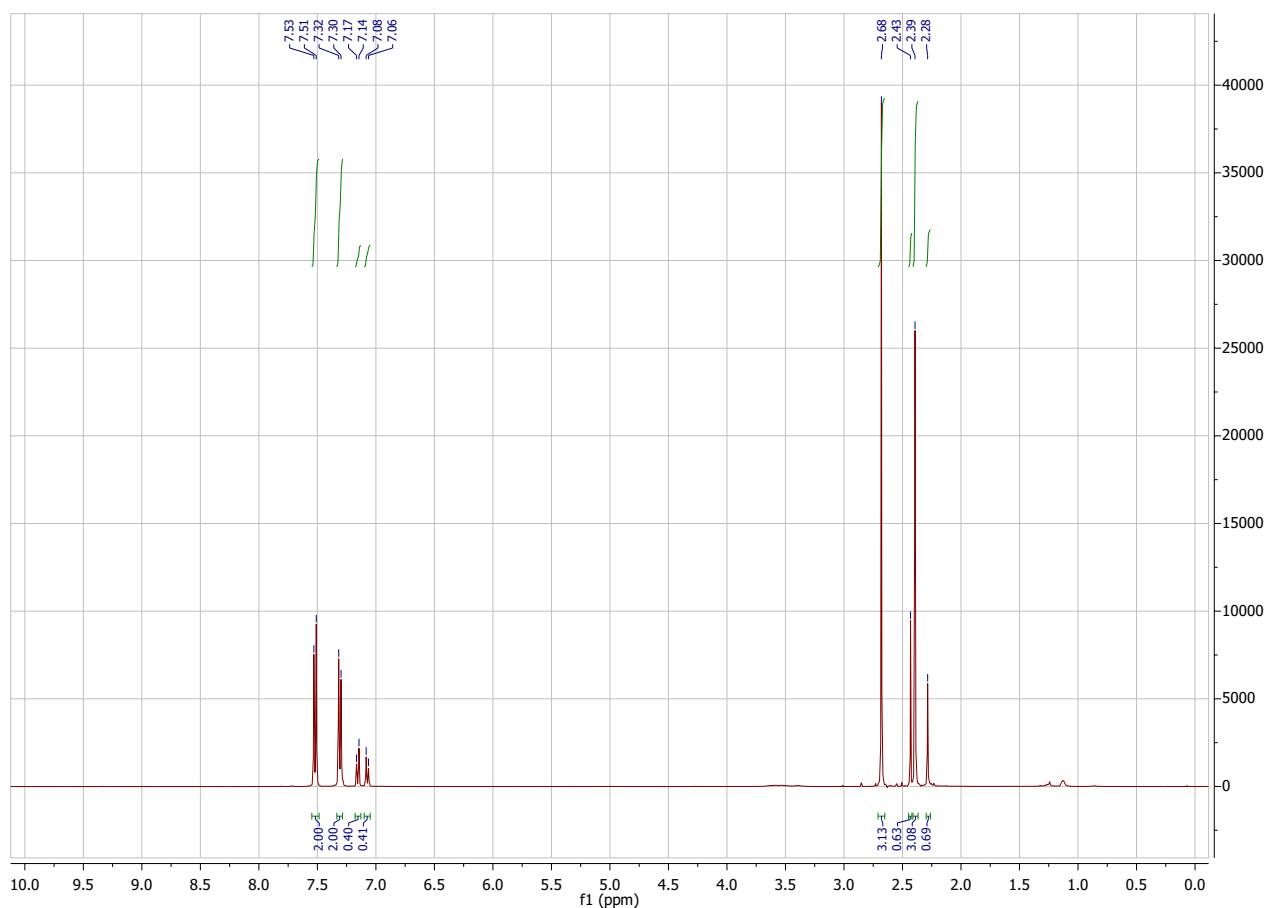

**Figure S5.** <sup>1</sup>H NMR (CDCl<sub>3</sub>) spectrum of a crude reaction mixture of *p*-tolyl methyl sulfide oxidation.

<sup>1</sup>H NMR spectrum of the 3<sup>rd</sup> run with EY-APTES@PDA@PUF (EY 0.18 mol%) in CH<sub>3</sub>CN/H<sub>2</sub>O (4:1) under 24 W white LED irradiation at 30–35 °C under O<sub>2</sub> balloon atmosphere after 48 h reaction (see Figure 7, run 3).

*p*-tolyl methyl sulfide (17%)

<sup>1</sup>H NMR (CDCl<sub>3</sub>, 400.13 MHz): δ 7.16 (d, 2H), 7.07 (d, 2H), 2.43 (s, 3H, CH<sub>3</sub>S), 2.28 (s, 3H, *p*-Me).

*p*-tolyl methyl sulfoxide (83%)

<sup>1</sup>H NMR (CDCl<sub>3</sub>, 400.13 MHz): δ 7.52 (d, 2H), 7.31 (d, 2H), 2.68 (s, 3H, CH<sub>3</sub>SO), 2.39 (s, 3H, *p*-Me).
